# Supplementary material for: PALLIA‐10, a screening tool to identify patients needing palliative care referral in comprehensive cancer centers: A prospective multicentric study (PREPA‐10)
Source: PubMed Central journal article supplement (PMC6558580; doi:10.1002/cam4.2118), 2019-05-04
Supplement: CAM4-8-2950-s001.pdf [file CAM4-8-2950-s001.pdf]

**Appendices/Supplemental Material**

**Content page: Supplementary Tables.**

**Supplementary S1.** The PALLIA 10 questionnaire. A. Translated version of the PALLIA-10 questionnaire, B. Original version of the PALLIA-10 questionnaire ..... p1-2

**Supplementary S2.** Recruiting sites, investigators, and numbers of inclusions at each recruiting sites..... p3

**Supplementary S3.** Receiver operator characteristic (ROC) analysis of the PALLIA-10 scores. The Youden index J was calculated to determinate the cut-off point for optimal sensitivity and specificity..... p4

**Supplementary S4.** Overall survival. Kaplan meier survival curves for patients according to their by PALLIA-10 score ..... p5

**Supplementary S5.** Final model of the multivariate Cox analysis..... p6

**Supplementary S1. The PALLIA 10 questionnaire.** A. Translated version of the PALLIA-10 questionnaire, B. Original version of the PALLIA-10 questionnaire (<http://www.sfap.org/rubrique/pallia-10>, p2)

**A.**

When should a palliative care team be requested? 10 questions survey- a decision assistance-tool.

Access to palliative care:

- A right for patients
- A professional obligation for health care teams

|    | Questions                                                                                                                                                                                                                                                   | Additional comments                                                                                                                                                                                                                                                                                                                                                    | Yes/No |
|----|-------------------------------------------------------------------------------------------------------------------------------------------------------------------------------------------------------------------------------------------------------------|------------------------------------------------------------------------------------------------------------------------------------------------------------------------------------------------------------------------------------------------------------------------------------------------------------------------------------------------------------------------|--------|
| 1  | The patient is currently suffering from an incurable disease at the present state of knowledge                                                                                                                                                              | A positive response is a necessary condition to start using the PALLIA 10 questionnaire and to answer the following questions                                                                                                                                                                                                                                          |        |
| 2  | There are negative prognostic factors                                                                                                                                                                                                                       | Factors that have been validated in oncology: hypoalbuminemia, inflammatory syndrome, lymphopenia, Performance Status >3 or corresponding Karnofsky index                                                                                                                                                                                                              |        |
| 3  | The disease is a rapidly progressive disease                                                                                                                                                                                                                |                                                                                                                                                                                                                                                                                                                                                                        |        |
| 4  | Patients or his/her caregiver who are seeking palliative care and support                                                                                                                                                                                   | French law n°99-477 dated June 9 <sup>th</sup> 1999 seeks to guarantee individuals their rights to access palliative care                                                                                                                                                                                                                                              |        |
| 5  | Persistent and unrelieved symptoms that remain despite the use of first-intent treatment                                                                                                                                                                    | Spontaneous or care-induced pain: dyspnoea, vomiting, occlusive syndrome, confusion, agitation etc...                                                                                                                                                                                                                                                                  |        |
| 6  | You note psychological frailty factors in the patient and/or his/her neighbourhood                                                                                                                                                                          | Sadness, anxiety, inward-looking attitudes, aggressiveness, behavioural troubles, communication troubles, family conflicts, pre-existing psychopathology in the patient and his/her neighbourhood                                                                                                                                                                      |        |
| 7  | You note psychological frailty factors in the patient and/or his/her caregiver                                                                                                                                                                              | Isolation, precarious situation, physical dependence, impact of health care, financial difficulty, presence of a dependant person in neighbourhood, young children                                                                                                                                                                                                     |        |
| 8  | The patient or his/her neighbourhood have difficulties to assimilate information on the disease and/or its prognosis                                                                                                                                        | Facing anxiety induced by disease progression, the patients and/or his/her caregiver setting up psychological defense mechanisms making the communication difficult and the initiation of palliative care more complicated                                                                                                                                             |        |
| 9  | You observe questions and/or divergences within the health-care team regarding the consistency of the care plan                                                                                                                                             | These questions may concern: <ul style="list-style-type: none"> <li>• Anticipated prescriptions</li> <li>• Indication: hydration, feeding, antibiotherapy, catheter insertion, transfusion, surveillance (glycemia, monitoring...)</li> <li>• Indication and initiation of sedation</li> <li>• Service at the point of care</li> <li>• Critical care status</li> </ul> |        |
| 10 | You are wondering about the appropriate approach regarding: <ul style="list-style-type: none"> <li>• Refusal of treatment</li> <li>• Limitation or discontinuation of treatment</li> <li>• Request for euthanasia</li> <li>• Conflicts of values</li> </ul> | The Leonetti's French law relative to patients' right and the end of life setting out issues relative to the refusal of treatment and modalities of decisions for treatment discontinuation and limitation in patients who are able or not to express their willingness.                                                                                               |        |

Please answer each question. "Yes" = 1 point

In the event of three or more positive responses, access to a specialized palliative care team should be considered.

**B.**

|    | Questions                                                                                                                                                                                                                                                                                          | Complément                                                                                                                                                                                                                                                                                                                                                                                                   | Oui/Non |
|----|----------------------------------------------------------------------------------------------------------------------------------------------------------------------------------------------------------------------------------------------------------------------------------------------------|--------------------------------------------------------------------------------------------------------------------------------------------------------------------------------------------------------------------------------------------------------------------------------------------------------------------------------------------------------------------------------------------------------------|---------|
| 1  | Le patient est atteint d'une maladie qui ne guérira pas, en l'état actuel des connaissances                                                                                                                                                                                                        | Une réponse positive à cette question est une condition nécessaire pour utiliser Pallia 10 et passer aux questions suivantes                                                                                                                                                                                                                                                                                 |         |
| 2  | Il existe des facteurs pronostiques péjoratifs                                                                                                                                                                                                                                                     | Validés en oncologie : hypo albuminémie, syndrome inflammatoire, lymphopénie, Performans Status >3 ou Index de Karnofsky                                                                                                                                                                                                                                                                                     |         |
| 3  | La maladie est rapidement évolutive                                                                                                                                                                                                                                                                |                                                                                                                                                                                                                                                                                                                                                                                                              |         |
| 4  | Le patient ou son entourage sont demandeurs d'une prise en charge palliative et d'un accompagnement                                                                                                                                                                                                | Loi n° 99-477 du 9 juin 1999 visant à garantir le droit d'accès aux soins palliatifs                                                                                                                                                                                                                                                                                                                         |         |
| 5  | Il persiste des symptômes non soulagés malgré la mise en place des traitements de première intention                                                                                                                                                                                               | Douleur spontanée ou provoquée lors des soins, dyspnée, vomissements, syndrome occlusif, confusion, agitation ...                                                                                                                                                                                                                                                                                            |         |
| 6  | Vous identifiez des facteurs de vulnérabilité d'ordre psychique pour le patient et/ou son entourage                                                                                                                                                                                                | Tristesse, angoisse, repli, agressivité ou troubles du comportement, troubles de la communication, conflits familiaux, psycho-pathologie préexistante chez le patient et son entourage                                                                                                                                                                                                                       |         |
| 7  | Vous identifiez des facteurs de vulnérabilité d'ordre social chez le patient et/ou l'entourage                                                                                                                                                                                                     | Isolement, précarité, dépendance physique, charge en soins, difficultés financières, existence dans l'entourage d'une personne dépendante, enfants en bas âge                                                                                                                                                                                                                                                |         |
| 8  | Le patient ou l'entourage ont des difficultés d'intégration de l'information sur la maladie et/ou sur le pronostic                                                                                                                                                                                 | Face à l'angoisse générée par la maladie qui s'aggrave, les patients, l'entourage peuvent mettre en place des mécanismes de défense psychologique qui rendent la communication difficile et compliquent la mise en place d'un projet de soin de type palliatif                                                                                                                                               |         |
| 9  | Vous constatez des questionnements et/ou des divergences au sein de l'équipe concernant la cohérence du projet de soin                                                                                                                                                                             | Ces questionnements peuvent concerner :<br><ul style="list-style-type: none"> <li>• prescriptions anticipées</li> <li>• indication : hydratation, alimentation, antibiothérapie, pose de sonde, transfusion, surveillance du patient (HGT, monitoring ...)</li> <li>• indication et mise en place d'une sédation</li> <li>• lieu de prise en charge le plus adapté</li> <li>• statut réanimatoire</li> </ul> |         |
| 10 | Vous vous posez des questions sur l'attitude adaptée concernant par exemple :<br><ul style="list-style-type: none"> <li>• un refus de traitement</li> <li>• une limitation ou un arrêt de traitement</li> <li>• une demande d'euthanasie</li> <li>• la présence d'un conflit de valeurs</li> </ul> | La loi Léonetti relative au droit des malades et à la fin de vie traite des questions de refus de traitement et des modalités de prise de décisions d'arrêt et de limitation de traitement autant chez les patients compétents que chez les patients en situation de ne pouvoir exprimer leur volonté                                                                                                        |         |

**Supplementary S2. Recruiting sites, investigators, and numbers of inclusions at each recruiting sites.**

| <b>Name of the principal investigator* and recruiting co-investigators</b> | <b>Investigation site</b>                  | <b>Number of patients / investigation site</b> |
|----------------------------------------------------------------------------|--------------------------------------------|------------------------------------------------|
| CHVETZOFF Gisèle,* MOLIN Yann                                              | Centre Léon Bérard                         | 100                                            |
| GALLAY Caroline                                                            | Institut Régional du Cancer de Montpellier | 73                                             |
| GRACH Marie-Christine                                                      | Centre François Baclesse                   | 67                                             |
| GUESDON Gérard                                                             | Institut Bergonié                          | 64                                             |
| CAPODANO Géraldine                                                         | Institut Paoli Calmettes                   | 60                                             |
| DUBROEUCQ Olivier                                                          | Institut Jean Godinot                      | 53                                             |
| BOULEUC Carole                                                             | Institut Curie – Paris                     | 50                                             |
| BREMAUD Nathalie                                                           | Centre Georges-François Leclerc            | 49                                             |
| FOGLIARINI Anne                                                            | Centre Antoine Lacassagne                  | 44                                             |
| HENRY Aline                                                                | Institut de Cancérologie de Lorraine       | 42                                             |
| CAUNES-HILARY Nathalie                                                     | IUC Toulouse Oncopole                      | 40                                             |
| VILLET Stéphanie                                                           | Centre Oscar Lambret                       | 40                                             |
| VILLATTE Christine                                                         | Centre Jean Perrin                         | 37                                             |
| FRASIE Véronique                                                           | Centre Paul Strauss                        | 34                                             |
| TRIOLAIRE Valérie                                                          | Institut Curie - Saint Cloud               | 30                                             |
| BARBAROT Véronique                                                         | ICL Nantes                                 | 25                                             |
| COMMER Jean-Marie                                                          | ICL Angers                                 | 18                                             |
| HUTIN Agnès                                                                | Centre Eugène Marquis                      | 14                                             |

**Supplementary S3. Receiver operator characteristic (ROC) analysis of the PALLIA-10 scores.** The Youden index J was calculated to determinate the cut-off point for optimal sensitivity and specificity.

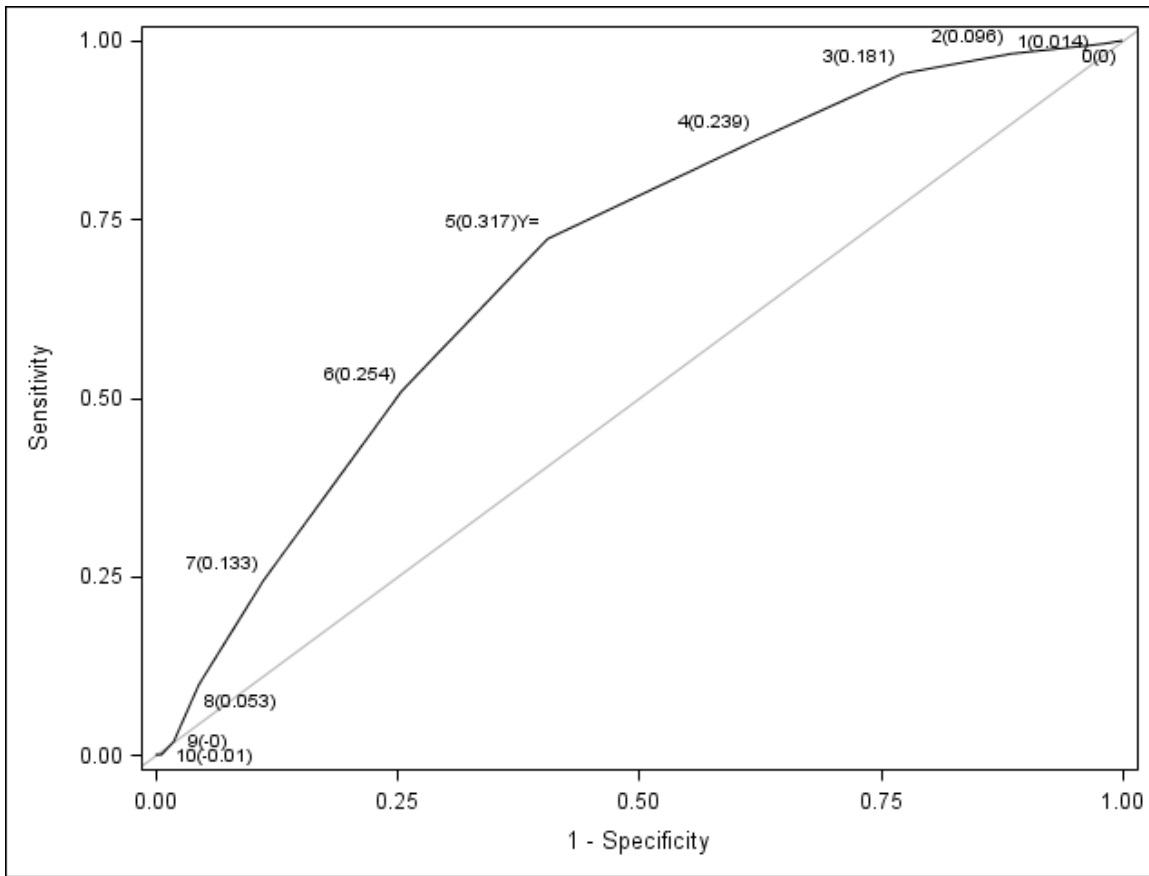

**Supplementary S4, Figure S. Overall survival.** Kaplan meier survival curves for patients according to their PALLIA-10 score.

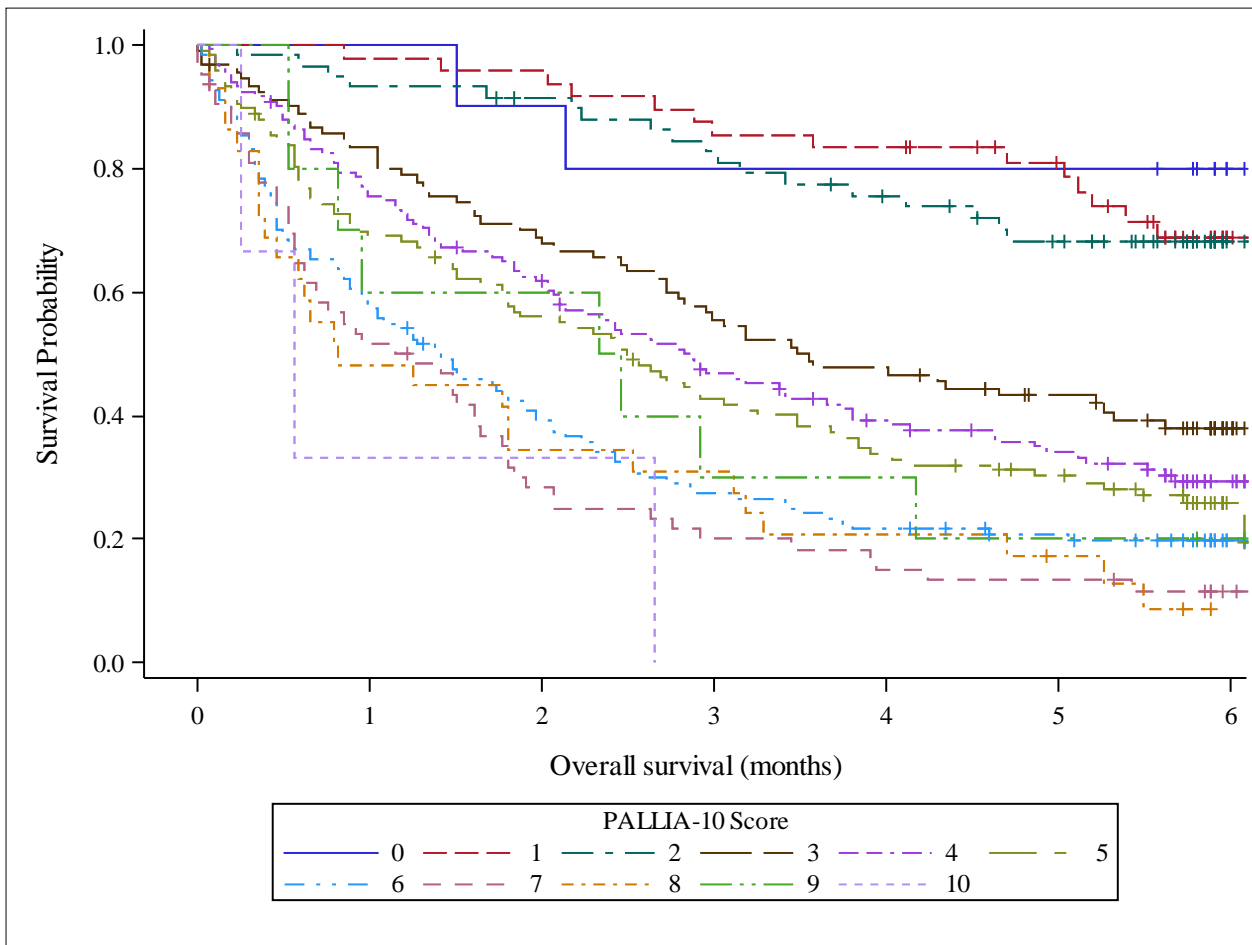

**Supplementary S5. Final model of the multivariate Cox analysis (PALLIA-10 score as quantitative variable).**

| Variables                  |                               | Hazard Ratio  | [CI 95%]      | P-value |
|----------------------------|-------------------------------|---------------|---------------|---------|
| PALLIA-10 score            | Quantitative value            | 1.175         | [1.110-1.244] | <.0001  |
| Karnofsky score            | >50 (Réf.)                    |               |               |         |
|                            | ≤50                           | 1.995         | [1.589-2.504] | <.0001  |
| Reasons of hospitalization | Treatment (Réf.)              |               |               |         |
|                            | Complications                 | 1.092         | [0.807-1.479] | <.0001  |
|                            | Symptoms                      | 1.622         | [1.269-2.074] | <.0001  |
| Tumor localization         | Breast (Réf.)                 |               |               |         |
|                            | Head and neck                 | 1.731         | [1.132-2.647] | <.0001  |
|                            | Bone and soft tissue          | 0.995         | [0.629-1.574] |         |
|                            | Lung and pleural tumors       | 1.991         | [1.442-2.748] |         |
|                            | Digestive system              | 1.719         | [1.251-2.362] |         |
|                            | Gynecological                 | 0.837         | [0.571-1.227] |         |
|                            | Urological                    | 1.110         | [0.771-1.596] |         |
| Others                     | 0.926                         | [0.597-1.438] |               |         |
| Number of metastases       | No metastatic site (Réf.)     |               |               |         |
|                            | One metastatic site           | 0.762         | [0.510-1.140] | 0.0004  |
|                            | At least two metastatic sites | 1.230         | [0.831-1.820] |         |
| Lymphocyte rate            | >0.7 G/l (Réf.)               |               |               |         |
|                            | ≤ 0.7 G/l                     | 1.350         | [1.103-1.652] | 0.0036  |
